# Supplementary material for: Oxidative Stress Down-Regulates MiR-20b-5p, MiR-106a-5p and E2F1 Expression to Suppress the G1/S Transition of the Cell Cycle in Multipotent Stromal Cells
Source: PubMed Central journal article supplement (PMC7053300; doi:10.7150/ijms.38832), 2020-02-04
Supplement: ijmsv17p0457s1.pdf [file ijmsv17p0457s1.pdf]

**Supplementary Table S1.** Sequences of miRNA primers used in the study

---

| <b>miRNA</b> | <b>Primer sequences (5'-3')</b> |
|--------------|---------------------------------|
| miR-17-5p    | CAAAGTGCTTACAGTGCAGGTAG         |
| miR-20a-5p   | TAAAGTGCTTATAGTGCAGGTAG         |
| miR-20b-5p   | CAAAGTGCTCATAGTGCAGGTAG         |
| miR-106a-5p  | AAAAGTGCTTACAGTGCAGGTAG         |
| U6           | CACCACGTTTATACGCCGGTG           |

---

miRNA sequences were derived from miRBase version 20.

**Supplementary Table S2. Deregulated miRNAs in H<sub>2</sub>O<sub>2</sub>-induced oxidative-stressed MSC**

| miRNA                            | Family   | Acc. No   | Chromosomal location | Sequence (5' → 3')        | Log <sub>2</sub> (FC) |
|----------------------------------|----------|-----------|----------------------|---------------------------|-----------------------|
| <b>Up-regulated miRNA (n=28)</b> |          |           |                      |                           |                       |
| miR-146a-5p                      | miR-146  | MI0000477 | 5q34                 | ugagaacugaaauccauggguu    | 2.407*                |
| miR-146b-5p                      | miR-146  | MI0003129 | 10q24.32             | ugagaacugaaauccauggguu    | 2.029*                |
| miR-4497                         | NA       | MI0016859 | 12q24.1              | cuccgggacggcugggc         | 1.179**               |
| miR-513a-5p                      | miR-506  | MI0003191 | Xq27.3               | uucacaggagggugucau        | 1.142                 |
| miR-4732-5p                      | NA       | MI0017369 | 17q11.2              | uguagagcaggagcaggaagcu    | 1.138*                |
| miR-4508                         | NA       | MI0016872 | 15q11.2              | gccccggcugggcgcgcg        | 1.055**               |
| miR-3178                         | NA       | MI0014212 | 16p13.3              | ggggcgcggccggaucg         | 1.043**               |
| miR-1587                         | NA       | MI0016905 | Xp11.4               | uugggcugggcuggguuggg      | 1.019**               |
| miR-4475                         | NA       | MI0016827 | 9                    | caagggaccaagcauucauuau    | 0.934*                |
| miR-513b                         | miR-506  | MI0006648 | Xq27.3               | uucacaaggaggugucauuau     | 0.905                 |
| miR-4299                         | NA       | MI0015829 | 11                   | gcuggugacaugagaggc        | 0.817*                |
| miR-921                          | miR-921  | MI0005713 | 1q24.1               | cuagugagggacagaaccaggauuc | 0.792                 |
| miR-433                          | miR-433  | MI0001723 | 14q32.2              | uacggugagccugucauuuuuc    | 0.790                 |
| miR-3621                         | NA       | MI0016012 | 9                    | cgcgggucggggucugcagg      | 0.773                 |
| miR-5191                         | NA       | MI0018170 | 1                    | aggauaggaagaauagaagugcu   | 0.745                 |
| miR-34a-5p                       | miR-34   | MI0000268 | 1p36.22              | uggcagugucuuaugcugguugu   | 0.733                 |
| miR-4484                         | miR-4484 | MI0016845 | 10                   | aaaaggcgggagaagcccca      | 0.623                 |
| miR-4511                         | NA       | MI0016877 | 15                   | gaagaacuguugcauuugcccu    | 0.607                 |
| miR-4788                         | miR-4788 | MI0017435 | 3                    | uuacggaccagcuaaggaggc     | 0.441                 |
| miR-221-3p                       | miR-221  | MI0000298 | Xp11.3               | agcuacauugucugcuggguuuc   | 0.393                 |
| miR-4449                         | miR-4449 | MI0016792 | 4                    | cgucccggggcugcgcgaggca    | 0.373                 |
| miR-4288                         | NA       | MI0015896 | 8                    | uugucugcugaguucc          | 0.366                 |
| miR-1275                         | miR-1275 | MI0006415 | 6                    | gugggggagaggcuguc         | 0.294                 |
| miR-4795-5p                      | NA       | MI0017442 | 3                    | agaaguggcuaauauauuga      | 0.246                 |
| miR-4423-3p                      | miR-4423 | MI0016760 | 1                    | auaggcaccaaaaagcaaca      | 0.187                 |
| miR-1973                         | NA       | MI0009983 | 4                    | accgugcaaagguagcaua       | 0.084                 |
| miR-29a-3p                       | miR-29   | MI000087  | 7q32.3               | uagcaccaucugaaucgguua     | 0.060                 |
| miR-181a-2-3p                    | miR-181  | MI0000269 | 9q33.3               | accacugaccguagacuacc      | 0.018                 |

**Down-regulated miRNA (n=22)**

|             |          |           |         |                         |          |
|-------------|----------|-----------|---------|-------------------------|----------|
| miR-16-5p   | miR-15   | MI0000070 | 13q14.2 | uagcagcacguaaaauuggcg   | -1.281*  |
| miR-17-5p   | miR-17   | MI0000071 | 13q31.3 | caaagugcuuacagucagguag  | -1.268*  |
| miR-20a-5p  | miR-17   | MI0000076 | 13q31.3 | uaaagugcuuauagucagguag  | -1.265** |
| miR-20b-5p  | miR-17   | MI0001519 | Xq26.2  | caaagugcucuauagucagguag | -1.217** |
| miR-106a-5p | miR-17   | MI0000113 | Xq26.2  | aaaagugcuuacagucagguag  | -1.158** |
| miR-106b-5p | miR-17   | MI0000734 | 7q22.1  | uaaagugcugacagucagau    | -0.943** |
| miR-19b-3p  | miR-19   | MI0000074 | 13q31.3 | ugugcaaaucuaugcaaacuga  | -0.927** |
| miR-15b-5p  | miR-15   | MI0000438 | 3q35.33 | uagcagcacaucauguuuaca   | -0.883*  |
| miR-663a    | miR-663  | MI0003672 | 20p11.1 | aggcggggcgccgcgggaccgc  | -0.827   |
| miR-665     | miR-665  | MI0005563 | 14q32.2 | accaggaggcugaggcccu     | -0.766   |
| miR-4521    | NA       | MI006887  | 17      | gcuaaggaaguccugucucag   | -0.697   |
| miR-3687    | miR-3687 | MI0016088 | 21      | cccggacaggcguucugcgacgu | -0.685   |
| miR-3158-5p | miR-3158 | MI0014186 | 10      | ccugcagagaggaagcccuuc   | -0.582   |
| miR-424-5p  | miR-322  | MI0001446 | Xq26.3  | cagcagcaauucauguuuugaa  | -0.530   |
| miR-29b-3p  | miR-29   | MI0000105 | 7q32.3  | uagcaccuuugaaaucaguguu  | -0.515   |
| miR-186-3p  | miR-186  | MI0000483 | 1p31.1  | gcccaaaggugaauuuuuuggg  | -0.404   |
| miR-4271    | NA       | MI0015879 | 3       | gggggaagaaaaggugggg     | -0.384   |
| miR-483-3p  | miR-483  | MI0002467 | 11p15.5 | ucacuccucuccucccgucuu   | -0.270   |
| miR-31-3p   | miR-31   | MI0000089 | 9p21.3  | ugcuauGCCAACAUAUUGCCAU  | -0.214   |
| miR-193a-3p | miR-193  | MI0000487 | 17q11.2 | aacuggccuacaagucccagu   | -0.155   |
| miR-548a-3p | miR-548  | MI0019132 | 13      | uaaaaccacaauuauuuugu    | -0.146   |
| miR-4635    | NA       | MI0017262 | 5       | ucuugaagucagaaccgcaa    | -0.098   |

miRBase version 20 was used in data derivation. Included are microarray data of log<sub>2</sub>(fold change, FC) between <-1 and >1.00, and \**P*<0.05, \*\**P*<0.01. NA, not assigned.

**Supplementary Table S3.** Gene ontology and KEGG pathway analysis of the deregulated miRNAs in **H<sub>2</sub>O<sub>2</sub>-induced oxidative-stressed MSC**

**A. Down-regulated miRNAs**

**Biological Process**

| Process                                                                                     | No. of genes |
|---------------------------------------------------------------------------------------------|--------------|
| GO:0035194~Posttranscriptional gene silencing by RNA                                        | 4            |
| GO:0060078~Regulation of postsynaptic membrane potential                                    | 4            |
| GO:0045737~Positive regulation of cyclin-dependent protein serine/threonine kinase activity | 4            |
| GO:0070372~Regulation of ERK1 and ERK2 cascade                                              | 4            |
| GO:0019228~Neuronal action potential                                                        | 4            |
| GO:2000145~Regulation of cell motility                                                      | 4            |
| GO:0003281~Ventricular septum development                                                   | 4            |
| GO:0000289~Nuclear-transcribed mRNA poly(A) tail shortening                                 | 4            |
| GO:0035278~miRNA mediated inhibition of translation                                         | 5            |
| GO:0045787~Positive regulation of cell cycle                                                | 5            |
| Total                                                                                       | 42           |

**Molecular Function**

| Function                                                                                                                 | No. of genes |
|--------------------------------------------------------------------------------------------------------------------------|--------------|
| GO:0005248~Voltage-gated sodium channel activity                                                                         | 4            |
| GO:0004709~MAP kinase kinase kinase activity                                                                             | 4            |
| GO:0003785~Actin monomer binding                                                                                         | 4            |
| GO:0004715~Non-membrane spanning protein tyrosine kinase activity                                                        | 4            |
| GO:0043022~Ribosome binding                                                                                              | 4            |
| GO:0005089~Rho guanyl-nucleotide exchange factor activity                                                                | 5            |
| GO:0004843~Thiol-dependent ubiquitin-specific protease activity                                                          | 5            |
| GO:0004725~Protein tyrosine phosphatase activity                                                                         | 6            |
| GO:0001078~Transcriptional repressor activity, RNA polymerase II core promoter proximal region sequence-specific binding | 6            |
| GO:0004674~Protein serine/threonine kinase activity                                                                      | 20           |
| Total                                                                                                                    | 62           |

## KEGG Pathway

| Pathway                             | No. of genes |
|-------------------------------------|--------------|
| hsa05223~Non-small cell lung cancer | 5            |
| hsa05211~Renal cell carcinoma       | 5            |
| hsa05219~Bladder cancer             | 6            |
| hsa05212~Pancreatic cancer          | 6            |
| hsa05214 ~Glioma                    | 6            |
| hsa05218~Melanoma                   | 6            |
| hsa05220~Chronic myeloid leukemia   | 7            |
| hsa05215~Prostate cancer            | 7            |
| hsa04012~ErbB signaling pathway     | 8            |
| hsa04110~Cell cycle                 | 9            |
| Total                               | 65           |

## B. Up-regulated miRNAs

### Biological Process

| Process                                                                 | No. of genes |
|-------------------------------------------------------------------------|--------------|
| GO:0036120~Cellular response to platelet-derived growth factor stimulus | 4            |
| GO:0008589~Regulation of smoothened signaling pathway                   | 4            |
| GO:0017157~Regulation of exocytosis                                     | 4            |
| GO:0045747~Positive regulation of Notch signaling pathway               | 4            |
| GO:0048791~Calcium ion-regulated exocytosis of neurotransmitter         | 4            |
| GO:0031397~Negative regulation of protein ubiquitination                | 4            |
| GO:0071277~Cellular response to calcium ion                             | 5            |
| GO:0038083~Peptidyl-tyrosine autophosphorylation                        | 6            |
| GO:0071230~Cellular response to amino acid stimulus                     | 6            |
| GO:0042733~Embryonic digit morphogenesis                                | 6            |
| Total                                                                   | 47           |

### Molecular Function

| Function                                                          | No. of genes |
|-------------------------------------------------------------------|--------------|
| GO:0005112~Notch binding                                          | 4            |
| GO:0005154~Eepidermal growth factor receptor binding              | 5            |
| GO:0004715~Non-membrane spanning protein tyrosine kinase activity | 5            |
| GO:0030145~Manganese ion binding                                  | 5            |
| GO:0008237~Metallopeptidase activity                              | 5            |

|                                                                                                                          |     |
|--------------------------------------------------------------------------------------------------------------------------|-----|
| GO:0001078~Transcriptional repressor activity, RNA polymerase II core promoter proximal region sequence-specific binding | 6   |
| GO:0004222~Metalloendopeptidase activity                                                                                 | 7   |
| GO:0005516~Calmodulin binding                                                                                            | 9   |
| GO:0000978~RNA polymerase II core promoter proximal region sequence-specific DNA binding                                 | 23  |
| GO:0003676~Nucleic acid binding                                                                                          | 38  |
| Total                                                                                                                    | 107 |

### KEGG Pathway

| Pathway                                        | No. of genes |
|------------------------------------------------|--------------|
| hsa05217 ~Basal cell carcinoma                 | 4            |
| hsa05416~Viral myocarditis                     | 4            |
| hsa05210~Colorectal cancer                     | 4            |
| hsa04918 ~Thyroid hormone synthesis            | 5            |
| hsa04520 ~Adherens junction                    | 5            |
| hsa04012~ErbB signaling pathway                | 5            |
| hsa04070~Phosphatidylinositol signaling system | 5            |
| hsa05205 ~Proteoglycans in cancer              | 8            |
| hsa04810 ~Regulation of actin cytoskeleton     | 9            |
| hsa05200 ~Pathways in cancer                   | 12           |
| Total                                          | 61           |

Online databases, including TargetScan v7.1, microT-CDS v5.0 and miRTarBase, were used to predict the genes that are targeted by the seven up-regulated and five down-regulated miRNAs (Table 1). A total of 437 genes in the up-regulated group and 405 genes in the down-regulated group were selected for gene ontology (GO) and KEGG pathway analysis by using DAVID Bioinformatics Resources v6.8. For the generation of the functional annotation chart, the threshold of minimum gene counts belonging to an annotation term was set at  $\geq 4$  and the Ease score threshold (modified Fisher Exact P-value) was set at 0.1. Top ten biological process, molecular function and KEGG terms with the highest fold enrichment score were then selected and tabulated.
